# Supplementary material for: Ca(BH4)2–LiBH4–MgH2: a novel ternary hydrogen storage system with superior long-term cycling performance
Source: Royal Society of Chemistry journal article supplement (doi:10.1039/c3ta12472j), 2013-01-01
Supplement: c3ta12472j.pdf [file c3ta12472j.pdf]

## Ca(BH<sub>4</sub>)<sub>2</sub>-LiBH<sub>4</sub>-MgH<sub>2</sub>: A Novel Ternary Hydrogen Storage System with Superior Long-Term Cycling Performance†

Mingxia Gao,<sup>a</sup> Jian Gu,<sup>a</sup> Hongge Pan,<sup>\*a</sup> Yiliu Wang,<sup>a</sup> Yongfeng Liu,<sup>a</sup> Chu Liang,<sup>a</sup> Zhengxiao Guo<sup>b</sup>

### Supplementary information

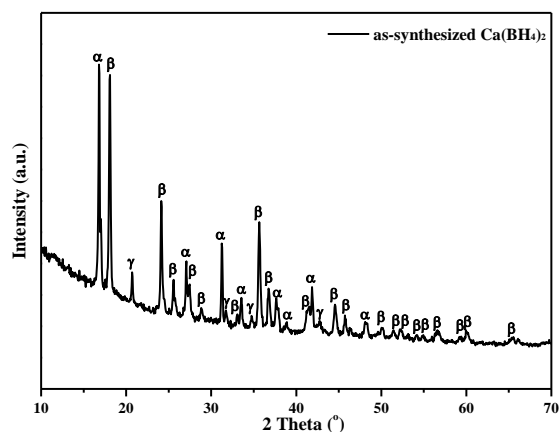

Fig. S1 XRD pattern of the as-synthesized Ca(BH<sub>4</sub>)<sub>2</sub>

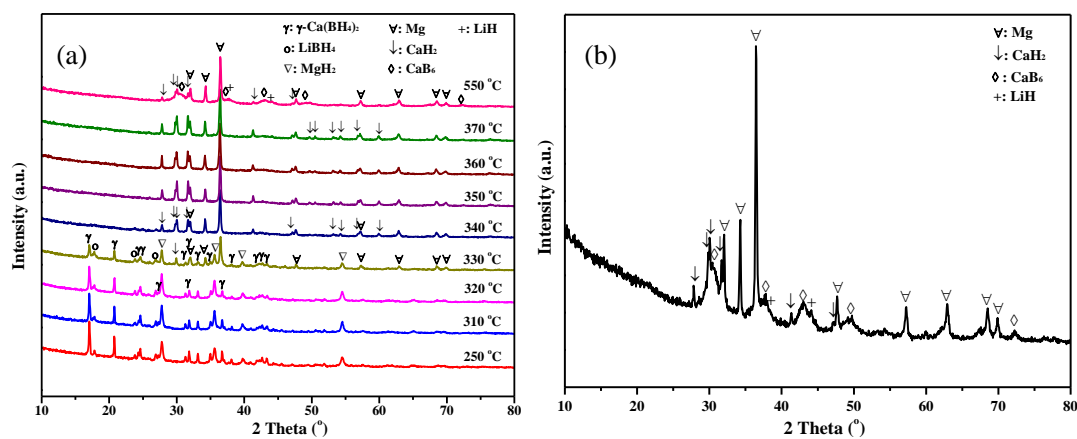

Fig. S2 XRD patterns of the dehydrogenation intermediates and product of the Ca(BH<sub>4</sub>)<sub>2</sub>+2LiBH<sub>4</sub>+2MgH<sub>2</sub> ternary system at different dehydrogenation temperatures (a) and the amplified pattern of the dehydrogenated product at 550 °C (b).

† Corresponding author. E-mail: [hgpan@zju.edu.cn](mailto:hgpan@zju.edu.cn) (H. Pan); Tel: +86-571-87952615; Fax: +86-571-87952615.

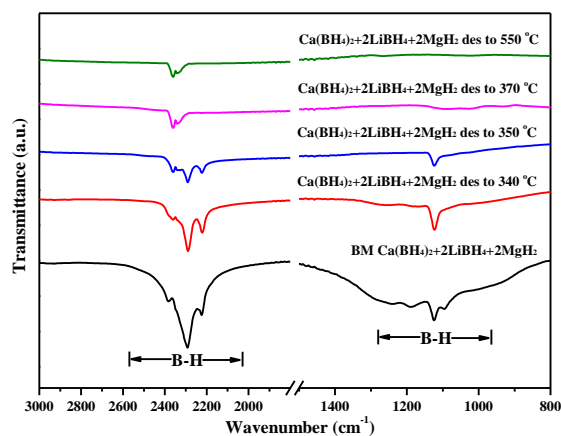

**Fig. S3** FTIR spectra of the dehydrogenation intermediates and product of the Ca(BH<sub>4</sub>)<sub>2</sub>+2LiBH<sub>4</sub>+2MgH<sub>2</sub> ternary system at different dehydrogenation temperatures.

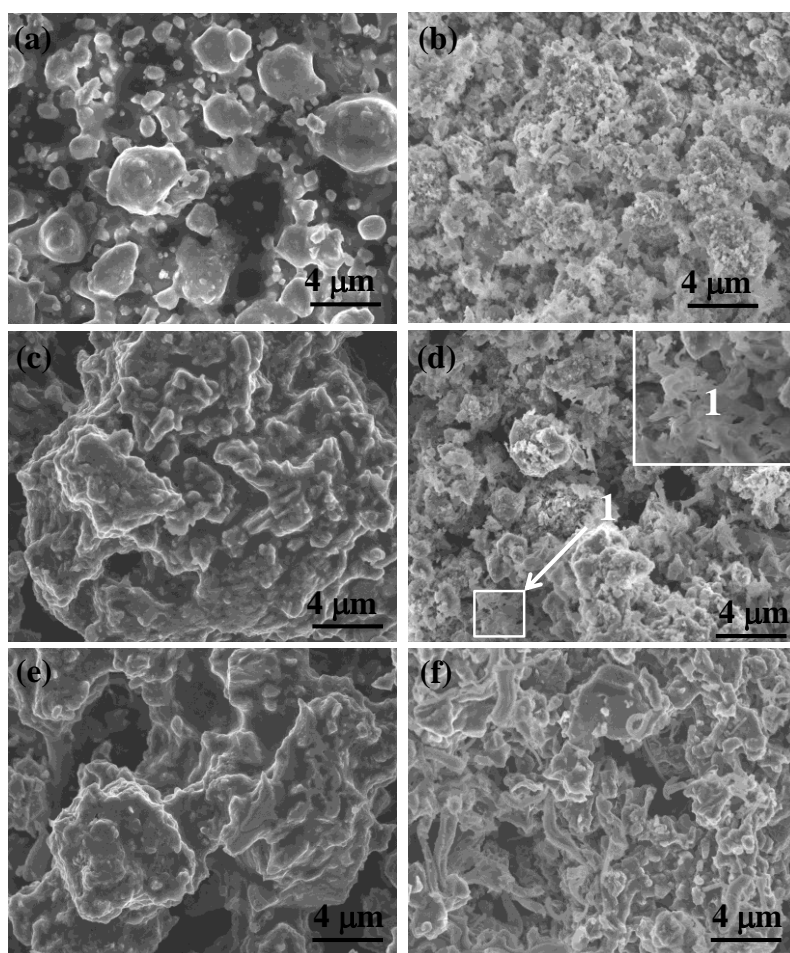

**Fig. S4** SEM images of the as-milled Ca(BH<sub>4</sub>)<sub>2</sub>+2LiBH<sub>4</sub>+2MgH<sub>2</sub> mixture (a), and the 1<sup>st</sup> dehydrogenation (b), 1<sup>st</sup> hydrogenation (c), 2<sup>nd</sup> dehydrogenation (d), 9<sup>th</sup> hydrogenation (e) and 10<sup>th</sup> dehydrogenation (f) products dehydrogenated at 370 °C for 30 min, and hydrogenated at 350 °C for 18 h.

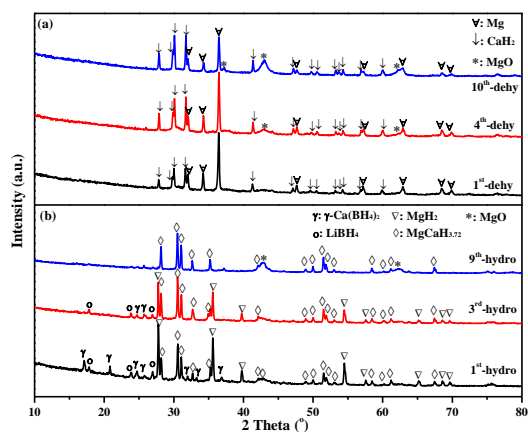

**Fig. S5** XRD patterns of the dehydrogenation (a) and re-hydrogenation (b) products of the  $\text{Ca}(\text{BH}_4)_2 + 2\text{LiBH}_4 + 2\text{MgH}_2$  system dehydrogenated at 370 °C for 30 min, and re-hydrogenated at 350 °C for 18 h for different cycles.

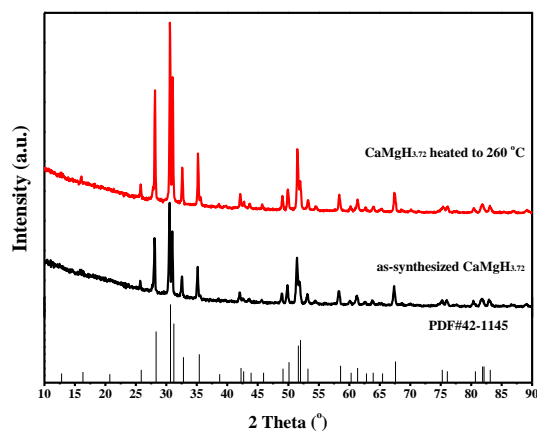

**Fig. S6** XRD patterns of the present synthesized  $\text{CaMgH}_{3.72}$  and its product heated to 260 °C.

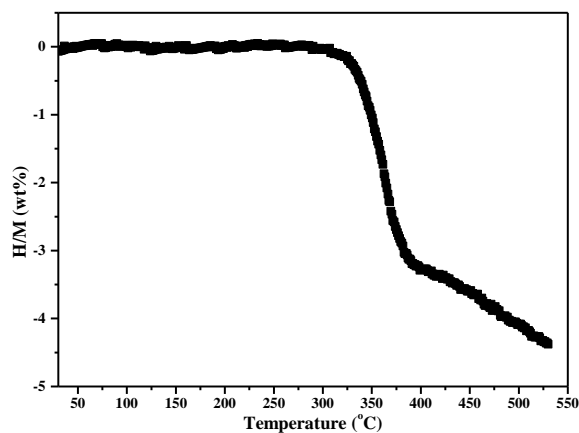

**Fig. S7** Dehydrogenation curve of the present synthesized  $\text{CaMgH}_{3.72}$ .

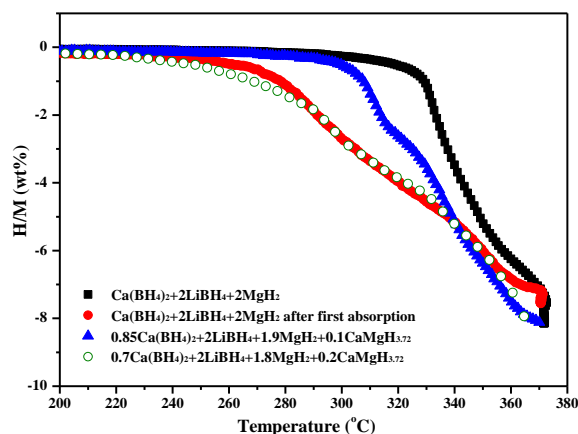

**Fig. S8** Dehydrogenation curves of the  $\text{Ca}(\text{BH}_4)_2+2\text{LiBH}_4+2\text{MgH}_2$  system of the 1<sup>st</sup> and the 2<sup>nd</sup> rounds, and the initial dehydrogenation curves of the  $0.85\text{Ca}(\text{BH}_4)_2+2\text{LiBH}_4+1.9\text{MgH}_2+0.1\text{CaMgH}_{3.72}$  and  $0.7\text{Ca}(\text{BH}_4)_2+2\text{LiBH}_4+1.8\text{MgH}_2+0.2\text{CaMgH}_{3.72}$  systems.

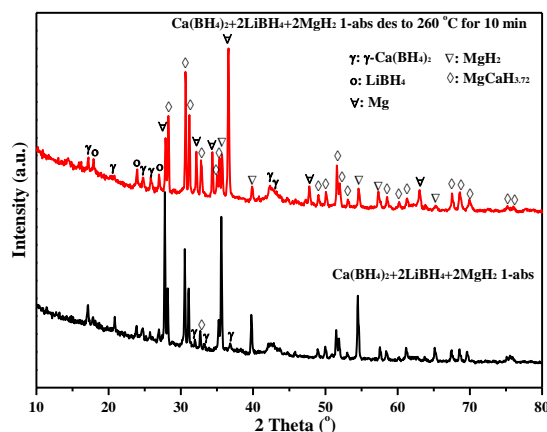

**Fig. S9** XRD patterns of the product of the 1<sup>st</sup> round hydrogenated product of the ternary system heated to 260 °C and dwelling for 10 min as well as the original hydrogenated product.

**Table S1** Desorption rates of the main desorption stages of the different systems

| System                                                  | Desorption rate (wt% $\text{H}_2$ $\text{min}^{-1}$ ) |
|---------------------------------------------------------|-------------------------------------------------------|
| $\text{Ca}(\text{BH}_4)_2+2\text{LiBH}_4+2\text{MgH}_2$ | 0.336                                                 |
| $\text{Ca}(\text{BH}_4)_2$                              | 0.178                                                 |
| $\text{Ca}(\text{BH}_4)_2+\text{MgH}_2$                 | 0.141                                                 |
| $\text{Ca}(\text{BH}_4)_2+2\text{LiBH}_4$               | 0.018                                                 |
| $2\text{LiBH}_4+\text{MgH}_2$                           | 0.013                                                 |

**Table S2** The apparent activation energy ( $E_a$ ) of dehydrogenation and the dehydrogenation reaction enthalpy ( $\Delta H$ ) of the different systems

| System                                                                   | $E_a$ (kJ mol <sup>-1</sup> ) |                       |                       | $\Delta H$ (kJ mol <sup>-1</sup> H <sub>2</sub> ) |
|--------------------------------------------------------------------------|-------------------------------|-----------------------|-----------------------|---------------------------------------------------|
|                                                                          | 1 <sup>st</sup> -step         | 2 <sup>nd</sup> -step | 3 <sup>rd</sup> -step | overall                                           |
| Ca(BH <sub>4</sub> ) <sub>2</sub> +2LiBH <sub>4</sub> +2MgH <sub>2</sub> | 162                           | 147                   | 143                   | 40.3                                              |
| BM Ca(BH <sub>4</sub> ) <sub>2</sub>                                     | 155                           | 209                   | —                     | 52.2                                              |
| Ca(BH <sub>4</sub> ) <sub>2</sub> +MgH <sub>2</sub>                      | 158                           | 191                   | —                     | 45.5                                              |
| 2LiBH <sub>4</sub> +MgH <sub>2</sub>                                     | 169                           | 168                   | —                     | 44.6                                              |
